# Supplementary material
Source: PubMed Central journal article supplement (PMC2900635)
Supplement: 1005039107_pnas.201005039SI.pdf [file 1005039107_pnas.201005039SI.pdf]

# Supporting Information

Chatzidaki-Livanis et al. 10.1073/pnas.1005039107

**Table S1. Primers used in this study**

| Purpose                    | Primer                  | Primer sequence                            |
|----------------------------|-------------------------|--------------------------------------------|
| Creation of $\Delta upaZ$  | Left flank forward      | TCCAGGATCCGGGAATGCTTTACTACATTGACCT         |
|                            | Left flank reverse      | ATACACGCGTTGCAGATTTTGGACTTGATTGACATA       |
|                            | Right flank forward     | CCTAACGCGTGCACAATGGAAGATAATCGGTATCC        |
| Creation of $\Delta upeZ$  | Left flank forward      | TCTAGGATCCAGGATAAAAAGGGTCCACTACCATCT       |
|                            | Left flank reverse      | TTCGGGATCCTTATGCTTCATTAGAGGAACAGCTT        |
|                            | Right flank forward     | ATGAACGCGTCTCATGAATCTGGGTCATAAGAGTA        |
| Creation of $\Delta uphZ$  | Right flank reverse     | CAGAACGCGTCTTTATCGATAGATGAGCAGGAGAC        |
|                            | Left flank forward      | TTGGGGATCCTAATTATCTCGCTCTGTGAATGGTT        |
|                            | Left flank reverse      | TTTCGGATCCCTTCCGTATATTTTCATCAGCCTTT        |
| Creation of $\Delta pupaZ$ | Right flank forward     | AAGACATATGTTGTACAAAGCGGTAATTTGAGAA         |
|                            | Right flank reverse     | TATTCATATGCGCAGTCTTGAAGAGAATCCTTAT         |
|                            | Right flank reverse     | CCTAGGATCCACAATGAATTTCTTCTCAAATCC          |
| Creation of $pupaZ$        | Forward                 | ATGCGGATCCCGTATTCTTTCAGCGTAATTCGTA         |
|                            | Reverse                 | AAAAGGATCCAAGAAGGTAGAAAAATTCATCCTAAAAA     |
| Creation of $pupbZ$        | Forward                 | ATTGGGATCCAGCGTCAAAGTTCCTAAAAGTTA          |
|                            | Reverse                 | GAAAGGATCCGCATAGAGAGCCAAAACGTAAG           |
| Creation of $pupcZ$        | Forward                 | TTTCGGATCCCGACGAATCATAATTCATTCCTTT         |
|                            | Reverse                 | CTTTGGATCCCCACCTGCTAAAAACAATACCTTTC        |
| Creation of $pupdZ$        | Forward                 | AAATGGATCCGTGGTGCATATTCGAATACGTA           |
|                            | Reverse                 | TCTAGGATCCACCTAAAACATGTAGAACAACAATCT       |
| Creation of $pupeZ$        | Forward                 | ATAAGGATCCATTCTCGCACCGTAATCAGTAATA         |
|                            | Reverse                 | AGTTGGATCCAAAAATACACGCTTTTCATTTTGA         |
| Creation of $pupfZ$        | Forward                 | CAATGGATCCCGAACCTGTCATCGAAAAAATAAC         |
|                            | Reverse                 | TAACGGATCCGCCAAGACAATACCTTTCATCAAT         |
| Creation of $pupgZ$        | Forward                 | GATAGGATCCGCCACTATTACCCTGATCTTATAG         |
|                            | Reverse                 | AACCGGATCCGCATATTATCTTTCGTTTCATCCAA        |
| Creation of $puphZ$        | Forward                 | AAAAGGATCCCGCTCGATCTTTAAACAGTAAAA          |
|                            | Reverse                 | AAAAGGATCCACAGTGTGTGTCGAAAAAGAAAA          |
| PSG promoter orientation   | PSG-promF               | TTTGCTTGTGTCCGTTTTG                        |
|                            | PSG-promR               | TCGAAGTCACCACCTGTAATAC                     |
| $xylE$ probe               | Forward                 | CAGCTGCGTGTACTGGACAT                       |
|                            | Reverse                 | ACGGTCATGAATCGTTCGTT                       |
| $upaY$ probe               | Forward                 | CCGAAAGTAACCTCTCGACTTTTA                   |
|                            | Reverse                 | TGCAGATTTTGGACTTGATTCATA                   |
| $upeY$ probe               | Forward                 | AAATCACTCAGGAATATATCCTTCTAAATG             |
|                            | Reverse                 | TATTACTGATTACGGTGCGAGAAT                   |
| $upcY$ probe               | Forward                 | TTGGAGACAACAGATAGCGATAAAC                  |
|                            | Reverse                 | TTTTTATTTCTTTCCGGACGTA                     |
| High expression promoter   | Forward                 | AGATAGATCTCAGCATCATGAAGAAGATAAAAATAGA      |
|                            | Reverse                 | AACAGGATCCAACGTTCTGTTCAATGGAACAA           |
| pMCL115                    | $upeY$ forward          | GTAAGGATCCAAATCACTCAGGAATATATCCTTCTAAATG   |
|                            | $upeY$ reverse          | TTACACGCGTACGCACCCCGTATTCATT               |
|                            | $upaY$ forward          | CATAACGCGTCTTTATTATATGAAGGATCTCTATACCCATAC |
|                            | $upaY$ reverse          | ATACGGATCCTGCAGATTTTGGACTTGATTGACATA       |
| pMCL116                    | BamHI deletion forward  | CCAATGAATACGGGGTGCCTTTATTATATGAAGGATCTC    |
|                            | BamHI deletion reverse  | GAGATCCTTCATATAATAAAGACGCACCCCGTATTCATTGG  |
|                            | $upaY$ forward2         | ATTTGGATCCCGAAAGTAACCTCTCGACTTTTA          |
|                            | Hybrid reverse          | TTACACGCGTACGCACCCCGTATTCATT               |
|                            | $upeY$ forward2         | CACAACGCGTCTTTTCTATATGCGTGATTTTGACAC       |
|                            | $upeY$ reverse2         | TAAGGGATCCTATTACTGATTACGGTGCGAGAAT         |
| BamHI deletion forward2    | BamHI deletion forward2 | CAATGAATACGGGGTGCCTTTTCTATATGCGTGATT       |
|                            | BamHI deletion reverse2 | AATCACGCATATAGAAAAGACGCACCCCGTATTCATTG     |

Restriction sites are underlined.
